# Supplementary material for: Prevalence of Gram-negative bacteria in ventilator-associated pneumonia in neonatal intensive care units: a systematic review and meta-analysis protocol
Source: PubMed Central journal article supplement — BMJ Open. 2016 Oct 11;6(10):e012298. doi: 10.1136/bmjopen-2016-012298 (PMC5073557; doi:10.1136/bmjopen-2016-012298), 2016-10-11
Supplement: bmjopen-2016-012298supp.pdf [file bmjopen-2016-012298supp.pdf]

|   | Pubmed Search syntax                                                                                                                                           |  | Date          | Relevant in 100 | NNR Number Needed to Read | No of articles |
|---|----------------------------------------------------------------------------------------------------------------------------------------------------------------|--|---------------|-----------------|---------------------------|----------------|
| 1 | “ventilator-associated pneumonia” OR pneumonia)                                                                                                                |  | 15-May - 2016 | 0               | -                         | 127952         |
| 2 | “ventilator-associated pneumonia” OR pneumonia) AND "gram negative"                                                                                            |  | 15-May - 2016 | 1               | 100                       | 3874           |
| 3 | ( “ventilator-associated pneumonia” OR pneumonia) AND "gram negative" AND (bacteria OR microorganism OR pathogens)                                             |  | 15-May - 2016 | 4               | 25                        | 3332           |
| 4 | (Prevalence OR incidence OR frequency OR outbreaks OR occurrence OR epidemiology OR epidemiologic studies OR “population-based”)) AND ( “ventilator-associated |  | 15-May - 2016 | 0               | -                         | 46085          |

|   |                                                                                                                                                                                                                                                         |  |               |   |     |      |
|---|---------------------------------------------------------------------------------------------------------------------------------------------------------------------------------------------------------------------------------------------------------|--|---------------|---|-----|------|
|   | pneumonia" OR pneumonia)                                                                                                                                                                                                                                |  |               |   |     |      |
| 5 | (Prevalence OR incidence OR frequency OR outbreaks OR occurrence OR epidemiology OR epidemiologic studies OR "population-based")) AND ("ventilator-associated pneumonia" OR pneumonia) AND "gram negative"                                              |  | 15-May - 2016 | 1 | 100 | 1751 |
| 6 | (Prevalence OR incidence OR frequency OR outbreaks OR occurrence OR epidemiology OR epidemiologic studies OR "population-based")) AND ("ventilator-associated pneumonia" OR pneumonia) AND "gram negative" AND (bacteria OR microorganism OR pathogens) |  | 15-May - 2016 | 1 | -   | 1531 |
| 7 | (Prevalence OR incidence OR frequency OR outbreaks OR occurrence OR epidemiology OR epidemiologic studies OR                                                                                                                                            |  | 15-May - 2016 | 6 | -   | 31   |

|  |                                                                                                                                                                                                   |  |  |  |  |  |
|--|---------------------------------------------------------------------------------------------------------------------------------------------------------------------------------------------------|--|--|--|--|--|
|  | <p>“population-based”) AND ( “ventilator-associated pneumonia” OR pneumonia) AND "gram negative" AND (bacteria OR microorganism OR pathogens) AND ( "NICU" OR “Neonatal Intensive care unit”)</p> |  |  |  |  |  |
|--|---------------------------------------------------------------------------------------------------------------------------------------------------------------------------------------------------|--|--|--|--|--|
